# Supplementary material for: Two-component regulatory systems in Pseudomonas aeruginosa: an intricate network mediating fimbrial and efflux pump gene expression
Source: PubMed Central journal article supplement (PMC3083521; doi:10.1111/j.1365-2958.2010.07527.x), 2011-01-24

## SUPPORTING INFORMATION

**Table S1.** The RocA2 regulon: microarray data.

| PA number | Gene / Alternate gene name | Predicted function                                             | Fold-change (Overexpression <i>rocS2</i> : WT/ $\Delta$ <i>rocA2</i> ) |
|-----------|----------------------------|----------------------------------------------------------------|------------------------------------------------------------------------|
| PA3045    | <i>rocA2</i>               | two-component response regulator                               | 17.93                                                                  |
| PA2275    | <i>yahK</i> ;              | probable alcohol dehydrogenase (Zn-dependent)                  | 2.869                                                                  |
| PA0248    | <i>pobR</i> ;              | probable transcriptional regulator                             | 2.552                                                                  |
| PA3788    |                            | hypothetical protein                                           | 2.243                                                                  |
| PA3411    |                            | hypothetical protein                                           | 2.116                                                                  |
| PA4182    |                            | hypothetical protein                                           | 2.111                                                                  |
| PA1899    | <i>phzA2</i>               | probable phenazine biosynthesis protein                        | 2.096                                                                  |
| PA0707    | <i>toxR</i>                | transcriptional regulator ToxR                                 | 2.046                                                                  |
| PA3593    |                            | probable acyl-CoA dehydrogenase                                | 1.961                                                                  |
| PA4224    | <i>pchG</i>                | pyochelin biosynthetic protein PchG                            | 1.855                                                                  |
| PA0510    | <i>nirE</i> ;              | probable uroporphyrin-III c-methyltransferase                  | 1.835                                                                  |
| PA2413    | <i>pvdH</i>                | L-2,4-diaminobutyrate:2-ketoglutarate 4-aminotransferase, PvdH | 1.82                                                                   |
| PA1426    |                            | hypothetical protein                                           | 1.736                                                                  |
| PA1569    |                            | probable major facilitator superfamily (MFS) transporter       | 1.723                                                                  |
| PA0698    |                            | hypothetical protein                                           | 1.714                                                                  |
| PA1404    |                            | hypothetical protein                                           | 1.71                                                                   |
| PA2358    |                            | hypothetical protein                                           | 1.702                                                                  |
| PA1334    |                            | probable oxidoreductase                                        | 1.686                                                                  |
| PA5541    | <i>pyrQ</i>                | dihydroorotase                                                 | 1.682                                                                  |
| PA0642    |                            | hypothetical protein                                           | 1.667                                                                  |
| PA2418    |                            | hypothetical protein                                           | 1.662                                                                  |
| PA2440    |                            | hypothetical protein                                           | 1.637                                                                  |
| PA4938    | <i>purA</i>                | adenylosuccinate synthetase                                    | 1.621                                                                  |
| PA2680    |                            | probable quinone oxidoreductase                                | 1.597                                                                  |
| PA0195    | <i>pntAA</i>               | putative NAD(P) transhydrogenase, subunit alpha part 1         | 1.586                                                                  |
| PA0268    |                            | probable transcriptional regulator                             | 1.585                                                                  |
| PA2683    | <i>tdcB</i> ;              | probable serine/threonine dehydratase, degradative             | 1.585                                                                  |
| PA5013    | <i>ilvE</i>                | branched-chain amino acid transferase                          | 1.573                                                                  |
| PA4159    | <i>fepB</i>                | ferrienterobactin-binding periplasmic protein precursor FepB   | 1.571                                                                  |
| PA4121    |                            | conserved hypothetical protein                                 | 1.571                                                                  |
| PA0339    |                            | hypothetical protein                                           | 1.566                                                                  |
| PA2289    |                            | conserved hypothetical protein                                 | 1.558                                                                  |
| PA5297    | <i>poxB</i>                | pyruvate dehydrogenase (cytochrome)                            | 1.554                                                                  |
| PA1854    |                            | conserved hypothetical protein                                 | 1.549                                                                  |
| PA4183    |                            | hypothetical protein                                           | 1.544                                                                  |
| PA4651    |                            | probable pili assembly chaperone                               | 1.54                                                                   |
| PA2665    | <i>ygaA</i> ;              | probable transcriptional regulator                             | 1.539                                                                  |
| PA2431    |                            | hypothetical protein                                           | 1.537                                                                  |
| PA3723    | <i>yqjM</i> ;              | probable FMN oxidoreductase                                    | 1.528                                                                  |

|        |        |                                                                                                   |        |
|--------|--------|---------------------------------------------------------------------------------------------------|--------|
| PA3307 |        | hypothetical protein                                                                              | 1.515  |
| PA5390 |        | probable peptidic bond hydrolase                                                                  | 1.514  |
| PA0723 | coaB   | coat protein B of bacteriophage Pfl)                                                              | 1.514  |
| PA0636 |        | hypothetical protein                                                                              | 1.511  |
| PA5342 |        | probable transcriptional regulator                                                                | 1.51   |
| PA0203 |        | probable binding protein component of ABC transporter                                             | -389.5 |
| PA0424 | mexR   | multidrug resistance operon repressor MexR                                                        | -23.76 |
| PA0426 | mexB   | Resistance-Nodulation-Cell Division (RND) multidrug efflux transporter MexB                       | -8.42  |
| PA0427 | oprM   | Major intrinsic multiple antibiotic resistance efflux outer membrane protein OprM precursor       | -8.229 |
| PA0425 | mexA   | Resistance-Nodulation-Cell Division (RND) multidrug efflux membrane fusion protein MexA precursor | -8.05  |
| PA1087 | flgL   | flagellar hook-associated protein type 3 FlgL                                                     | -6.988 |
| PA0207 |        | probable transcriptional regulator                                                                | -4.138 |
| PA0202 |        | probable amidase                                                                                  | -3.862 |
| PA1892 |        | hypothetical protein                                                                              | -2.829 |
| PA2412 |        | conserved hypothetical protein                                                                    | -2.359 |
| PA2310 |        | hypothetical protein                                                                              | -2.338 |
| PA4507 |        | hypothetical protein                                                                              | -2.013 |
| PA4506 | dppF ; | probable ATP-binding component of ABC dipeptide transporter                                       | -1.962 |
| PA2135 |        | probable transporter                                                                              | -1.924 |
| PA2670 |        | hypothetical protein                                                                              | -1.889 |
| PA5053 | hslV   | heat shock protein HslV                                                                           | -1.828 |
| PA5256 | dsbH   | disulfide bond formation protein                                                                  | -1.813 |
| PA2130 | cupA3  | usher CupA3                                                                                       | -1.806 |
| PA1664 |        | hypothetical protein                                                                              | -1.798 |
| PA1699 | pcr1 ; | conserved hypothetical protein in type III secretion                                              | -1.778 |
| PA0717 |        | hypothetical protein of bacteriophage Pfl                                                         | -1.765 |
| PA5191 |        | hypothetical protein                                                                              | -1.759 |
| PA0719 |        | hypothetical protein of bacteriophage Pfl                                                         | -1.727 |
| PA3406 | hasD   | transport protein HasD                                                                            | -1.699 |
| PA1893 |        | hypothetical protein                                                                              | -1.686 |
| PA3842 | orf1 ; | probable chaperone                                                                                | -1.659 |
| PA0044 | exoT   | exoenzyme T                                                                                       | -1.651 |
| PA0213 | mdeG ; | hypothetical protein                                                                              | -1.624 |
| PA0996 | pqsA   | probable coenzyme A ligase                                                                        | -1.623 |
| PA1708 | popB   | translocator protein PopB                                                                         | -1.61  |
| PA2891 | atuF   | geranyl-CoA carboxylase, alpha-subunit (biotin-containing)                                        | -1.604 |
| PA1706 | pcrV   | type III secretion protein PcrV                                                                   | -1.599 |
| PA3126 | ibpA   | heat-shock protein IbpA                                                                           | -1.594 |
| PA5450 | wzt    | ABC subunit of A-band LPS efflux transporter                                                      | -1.569 |
| PA4120 |        | probable transcriptional regulator                                                                | -1.565 |
| PA2595 |        | conserved hypothetical protein                                                                    | -1.559 |
| PA2303 |        | hypothetical protein                                                                              | -1.557 |
| PA4188 |        | conserved hypothetical protein                                                                    | -1.556 |
| PA4500 |        | probable binding protein component of ABC transporter                                             | -1.54  |
| PA1991 |        | probable iron-containing alcohol dehydrogenase                                                    | -1.516 |

|               |        |                                                       |        |
|---------------|--------|-------------------------------------------------------|--------|
| <b>PA0186</b> | atsR ; | probable binding protein component of ABC transporter | -1.511 |
| <b>PA2653</b> | yuiF ; | probable transporter                                  | -1.507 |

---

**Table S2.** Oligonucleotides used in this study

| Oligonucleotide name  | Oligonucleotide sequence*             |
|-----------------------|---------------------------------------|
| <i>rocA2</i> deletion |                                       |
| UA3045                | AACGAGCTCCGTGGCTCGGTCAATGAAGA         |
| LA3045                | CGCGGATCCGCTCATTGTCTGATTCCTT          |
| UB3045                | CGCGGATCCATCTAAGGGCCGGAACCGAA         |
| LB3045                | GCTCTAGACCAGTCGGAATCGGTCAACA          |
| <i>cupC1</i> promoter |                                       |
| PromC1up              | AGATCGGACCAGATAGAGGT                  |
| PromC1down            | CCGAGGCTTACGTCGATGGTC                 |
| <i>cupB1</i> promoter |                                       |
| PromB1up              | AGGGTTCTCCTCGTCGTGGG                  |
| PromB1down            | TTGATATCGCACGCGACTTCG                 |
| Bacterial two-hybrid  |                                       |
| rocS2H2up             | GCTCTAGAGGGCGACCTCTTTCGGACGCGA        |
| rocS2H2down           | GGGGTACCGGAAGGGCTCATACCGCAGC          |
| rocA2D2up             | GCTCTAGAAAATCAGACAATGAGCCGTA          |
| rocA2D2down           | GGGGTACCTCAAACCGAGCTGGGAAAGTAACTG     |
| gacSHDHup             | GCTCTAGACAGGATCAAGTCCGAGTTCC          |
| gacSHDHdown           | GGGGTACCTGCGCATGGTCAGAGTTCGC          |
| gacAD2up              | AAAACCTGCAGCGTGATTAAGGTGCTGGTGGTCGACG |
| gacAD2down            | CGGAATTCTATTAGGCCGAAGACCTGGCGAATCGCC  |
| trpOD2up              | GCCTCTAGAGCGCATGAGTAAGGTGCTGATCGTCG   |
| trpOD2down            | GGGGTACCTCAATGGTTGATGCTGCGCAACGCCCGGT |
| qPCR                  |                                       |
| mexAup                | TGAACGGCATCATCCTCAAG                  |
| mexAdown              | TGGTAGTCGGCCTCGTAGGT                  |
| mexRup                | CGCCCGACGTCCATGTAT                    |
| mexRdown              | CGGGTGATCAGTGCCTTGT                   |
| 16SrRNAup             | CGCCGTAAACGATGTCGACTA                 |
| 16SrRNA down          | TTAACCTTGCGGCCGTA                     |

\*Oligonucleotides are presented in the orientation 5'-3'.

**Fig. S1.** Domain organization of paralogous Roc proteins of *P. aeruginosa*. This representation is based on predictions of Protein families' database of alignments (Pfam). Pfam accession for each domain is as follows: Sbp3 (PF00497), PAS (PF00989, PF08448), HisKA (PF00512), HATPase\_c (PF02518), RR (PF00072), Hpt (PF01627), GerE (PF00196) and EAL (PF00563). The sensor kinases RocS1 and RocS2 domains named H1, D1 and H2 refer to the HisKA/HATPase\_c, RR and Hpt domains, respectively. For the response regulators, the RR and GerE are referred to as the D2 and helix-turn-helix (HTH) domains, respectively (Kulasekara *et al.*, 2005). TM indicates the location of the transmembrane segment of the sensor kinases. RocS1 and RocS2 are paralogous proteins with 45% identity, 63% similarity and RocA1 and RocA2 are also paralogous proteins with 59% identity, 73% similarity. The RocR response regulator is also shown with a D2 domain and an EAL-containing domain with phosphodiesterase activity.

**Fig. S2.** Activity of the *cupB* promoter in different *P. aeruginosa* strains. The strains tested are the wild type PAK, the *rocA2* mutant (PAK $\Delta$ *rocA2*), the *rocA1* mutant (PAK $\Delta$ *rocA1*), and the *rocA1/rocA2* mutant, all carrying the transcriptional *cupB-lacZ* fusion on the chromosome at the *attB* site. Where indicated the strain contains a plasmid expressing the *rocS1* gene (pMMB67-*rocS1*), or empty vector (pMMB67EH). All data presented are the average of biological duplicates and error bars indicate one standard deviation of the mean.  $\beta$ -galactosidase activity is expressed in Miller units.

**Figure S1**

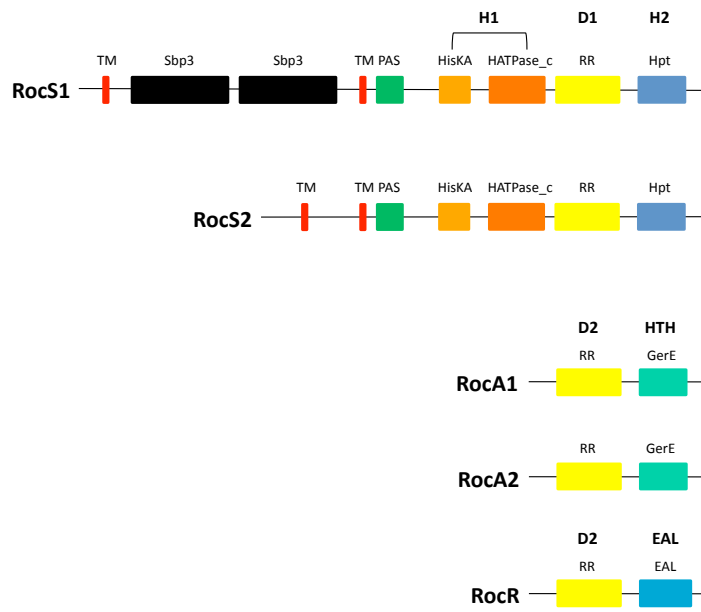

**Figure S2**

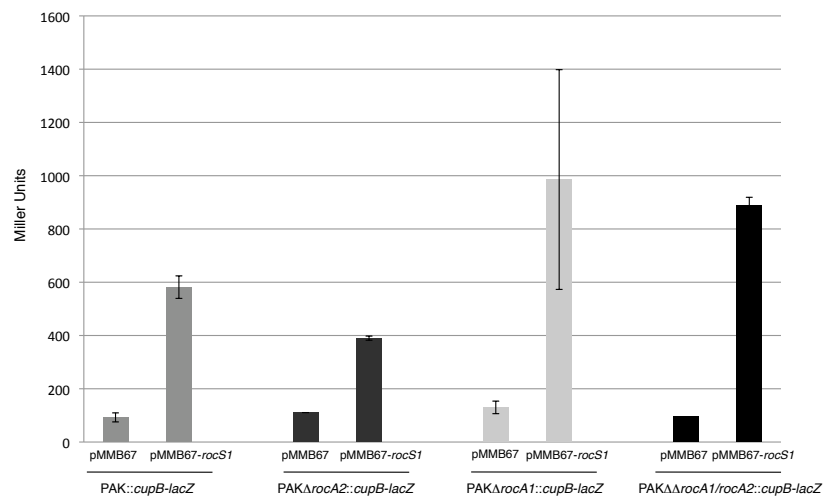

Supplement: mmi0079-1353-SD1.pdf [file mmi0079-1353-SD1.pdf]
